# Supplementary material for: Detection of the T790M mutation of EGFR in plasma of advanced non–small cell lung cancer patients with acquired resistance to tyrosine kinase inhibitors (West Japan oncology group 8014LTR study)
Source: PubMed Central journal article supplement (PMC5295446; doi:10.18632/oncotarget.11303), 2016-08-16
Supplement: oncotarget-07-58492-s001.pdf [file oncotarget-07-58492-s001.pdf]

## Detection of the T790M mutation of *EGFR* in plasma of advanced non–small cell lung cancer patients with acquired resistance to tyrosine kinase inhibitors (West Japan oncology group 8014LTR study)

### SUPPLEMENTARY TABLE

Supplementary Table S1: Detection of TKI-sensitizing and T790M mutations of *EGFR* both in diagnostic specimens and in either tumor tissue or malignant fluid (rebiopsy) specimens obtained after the development of EGFR-TKI resistance ( $n = 41$ )

| <i>EGFR</i> mutation status | Diagnostic specimens (commercial assays) | Rebiopsy specimens (ddPCR) |
|-----------------------------|------------------------------------------|----------------------------|
| L858R                       | 15                                       | 14                         |
| Exon 19 deletion            | 26                                       | 19                         |
| T790M                       | 0                                        | 31                         |
